# Supplementary material
Source: PubMed Central journal article supplement (PMC3624701)
Supplement: NIHMS336340-supplement-supplement_1.pdf [file NIHMS336340-supplement-supplement_1.pdf]

**Supplementary Table 1. Inhibitors of platelet activation pathways.** Inhibitors summarized in the table represent small molecule chemicals and monoclonal antibody known to inhibit various pathways of platelet activation. BAPTA-AM – 1,2-Bis(2-aminophenoxy)ethane-N,N,N',N'-tetraacetic acid tetrakis(acetoxymethyl ester), membrane permeant intracellular Ca<sup>2+</sup> chelator; TBHQ – 2,5-di-(tert-butyl)-1,4-hydroquinone, sarco-endoplasmic reticulum Ca<sup>2+</sup> ATP-ase type 3 (SERCA3) blocker; 2-APB – 2-aminoethoxydiphenylborate, store operated calcium entry (SOCE) Ca<sup>2+</sup> channel blocker; ReoPro – monoclonal antibody neutralizing  $\alpha$ IIb/ $\beta$ IIIa integrin ; NF449 – 4,4',4'',4'''-[carbonylbis(imino-5,1,3,-benzotriyl-bis(carbonylimino))]tetrakis-1,3-benzenedisulfonic acid octasodium salt; MRS2500 – (1R,2S,4S,5S)-4-[2-iodo-6-(methylamino)-9H-purin-9-yl]-2-(phosphonoxy)bicyclo[3.1.0]hexane-1-methanol dihydrogen phosphate ester tetraammonium salt; Axon1275 – N<sup>3</sup>-cyclopropyl-7-(4-isopropyl-benzyl)-7H-pyrrolo[3,2-f]quinazoline-1,3-diamine dihydrochloride; Go6976 - 12-(2-Cyanoethyl)-6,7,12,13-tetrahydro-13-methyl-5-oxo-5H-indolo(2,3-a)pyrrolo(3,4-c)-carbazole

| Inhibitor                  | Function                                                     | Reference |
|----------------------------|--------------------------------------------------------------|-----------|
| <b>DM-BAPTA AM</b>         | Intracellular Ca <sup>2+</sup> chelator                      | 15        |
| <b>THBQ</b>                | SERCA blocker                                                | 15        |
| <b>2-APB</b>               | Ca <sup>2+</sup> channel blocker with proven effects on SOCE | 15        |
| <b>SK&amp;F96365</b>       | Ca <sup>2+</sup> channel blocker with proven effects on SOCE | 15        |
| <b>NF449</b>               | P2X1 inhibitor                                               | 15        |
| <b>MRS2500</b>             | P2Y1 inhibitor                                               | 16        |
| <b>Aspirin</b>             | COX2 inhibitor                                               | 16        |
| <b>1,10-phenanthroline</b> | MMP inhibitor                                                | 16        |
| <b>Axon 1275</b>           | PAR1 inhibitor                                               | 16        |
| <b>2-MeSAMP</b>            | P2Y12 inhibitor                                              | 16        |
| <b>Go6976</b>              | PKC inhibitor                                                | 16        |
| <b>ReoPro</b>              | $\alpha$ II/ $\beta$ III integrin inhibitor                  | 16        |

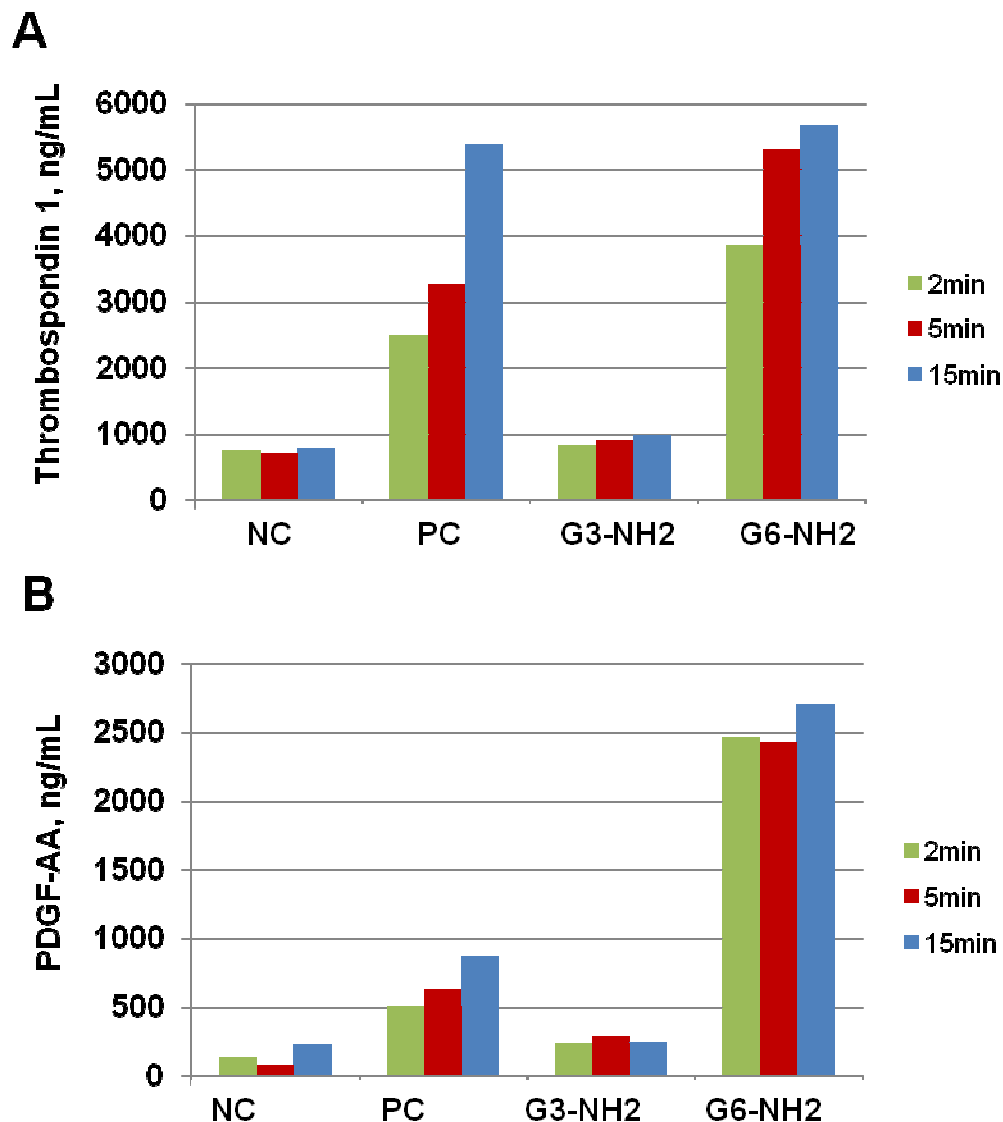

**Supplementary figure 1 A and B. Effects of cationic dendrimers on release of intermediate signaling molecules from intracellular storage of human platelets *in vitro*.** Platelet aggregation was studied in platelets derived from three individual donors. Platelet rich plasma was treated with negative control, positive control, or amine terminated G3 or G6 PAMAM dendrimers at final concentration of 100  $\mu\text{g}/\text{mL}$ . Treatment time was 2, 5 or 15 minutes. Thrombospondin A and PDGF-AA were measured by commercial ELISA kits obtained from R&D Systems according to the manufacturer's instructions. Shown is mean result (N=2) (%CV <20).

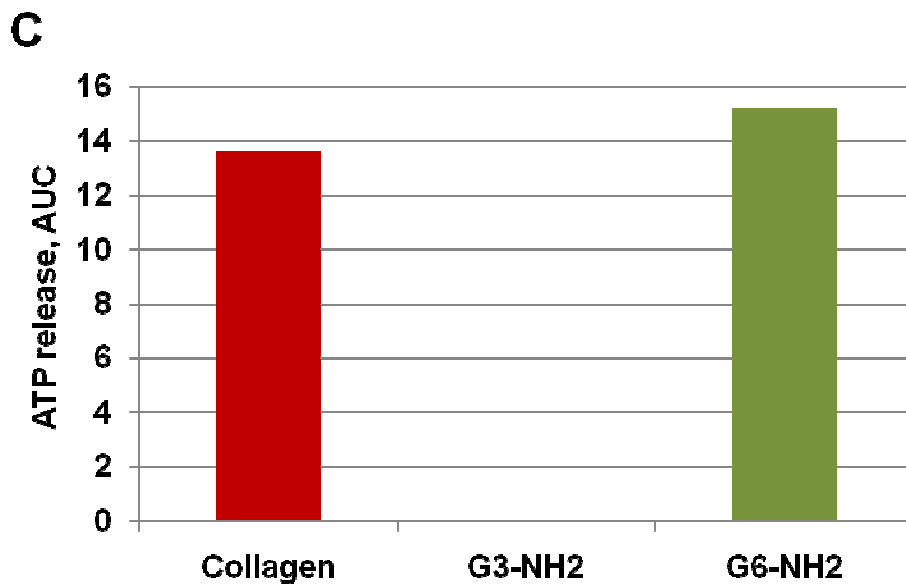

25  
26  
27  
28  
29  
30  
31  
32  
33  
34  
35  
36  
37  
38  
39  
40  
41  
42  
43  
44  
45  
46  
47  
48  
49  
50  
51  
52  
53  
54  
55  
56  
57  
58  
59  
60

**Supplementary figure 1C. Effects of cationic dendrimers on release of intermediate signaling molecules from intracellular storage of human platelets *in vitro*.** ATP release was studied in platelets derived from three individual donors. After untreated platelet rich plasma (PRP) was used to set up instrument baseline, the PRP was treated with collagen (positive control,) or amine terminated G3 or G6 PAMAM dendrimers at final concentration of 100  $\mu\text{g}/\text{mL}$ . ATP release was monitored during 15 minutes after addition of the agonist using ChronoLog Lumiaggregometer. Area under the curve (AUC) was calculated for each sample. Shown is mean result (N=2) (%CV <20)

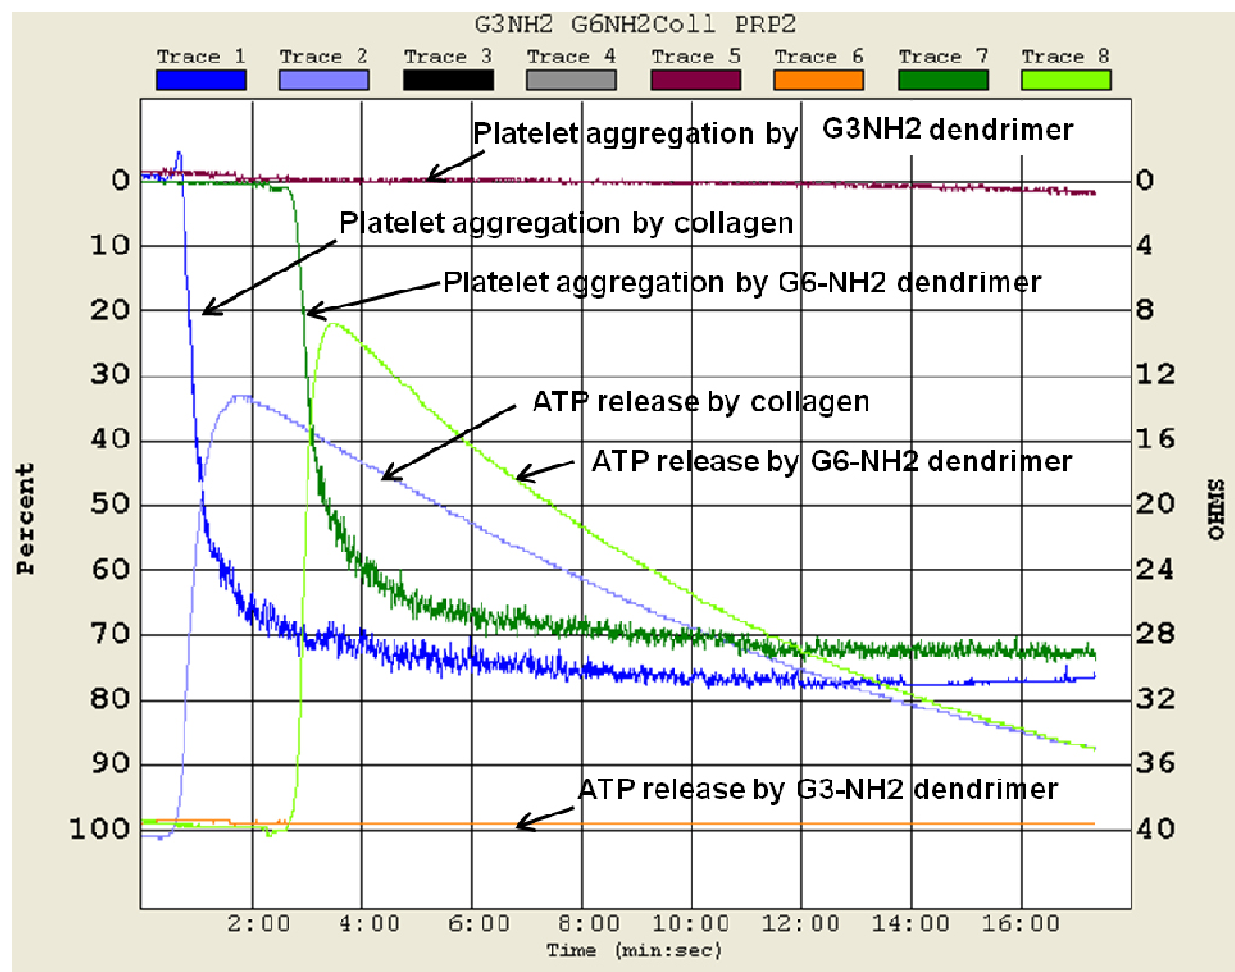

**Supplementary figure 2. Effects of cationic dendrimers on ATP release and aggregation of human platelets *in vitro*.** Platelet aggregation and ATP release was studied simultaneously in platelets derived from three individual donors. After untreated platelet reach plasma (PRP) was used to set up instrument baseline, the PRP was treated with collagen (positive control,) or amine terminated G3 or G6 PAMAM dendrimers at final concentration of 100  $\mu\text{g}/\text{mL}$ . Platelet aggregation (Traces 1, 5 and 7) and release of ATP (Traces 2, 6 and 8) were monitored during 15 minutes after addition of the agonist using ChronoLog Lumiaggregometer.
